# Supplementary material for: Ni2+ion assisted synthesis of hexagonal α-Fe2O3nanoplates as anode materials for lithium-ion batteries
Source: Royal Society of Chemistry journal article supplement (doi:10.1039/c4nj01354a), 2014-09-09
Supplement: c4nj01354a1.pdf [file c4nj01354a1.pdf]

# **Ni<sup>2+</sup> ions assisted synthesis of hexagonal $\alpha$ -Fe<sub>2</sub>O<sub>3</sub> nanoplates as anode materials for lithium-ion batteries†**

Rencheng Jin,<sup>a\*</sup> Lixia Yang,<sup>a</sup> Guihua Li,<sup>a</sup> and Gang Chen<sup>b</sup>

Table S1 Composition of the Fe<sub>2</sub>O<sub>3</sub> nanoplates obtained with addition of different amount of NiCl<sub>2</sub>.

| Sample | Rate of charge (Fe:Sn, mmol) | Fe : Ni |
|--------|------------------------------|---------|
| A      | 2:0.3                        | 1:0.064 |
| B      | 2:0.6                        | 1:0.143 |
| C      | 2:1.2                        | 1:0.301 |

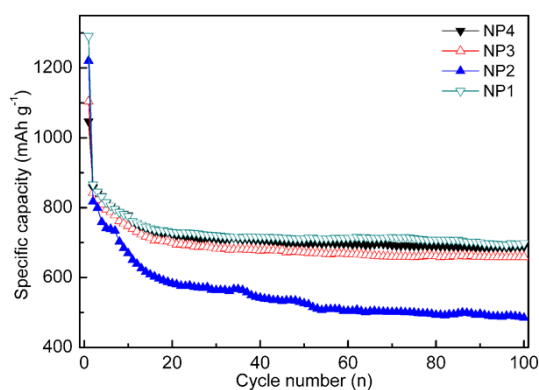

Fig. S1 Cycling performance of the samples obtained with addition of different amount of NiCl<sub>2</sub> at a current density of 100 mA g<sup>-1</sup>.
